# Supplementary material
Source: HighWire-hosted journal article supplement (https://cmaj.ca/highwire/filestream/99472/field_highwire_adjunct_files/1/210873-res-2-at.pdf)
Supplement: 210873-res-2-at.pdf [file 210873-res-2-at.pdf]

Supplementary Table 1 – Study definitions

| Clinical manifestation               | Definition                                                                                                                                                                                                                                                         |
|--------------------------------------|--------------------------------------------------------------------------------------------------------------------------------------------------------------------------------------------------------------------------------------------------------------------|
| Intensive care unit admission        | Admission to a pediatric or neonatal intensive care unit                                                                                                                                                                                                           |
| Critical disease                     | Admission to an intensive care unit with use of vasopressors or non-invasive or mechanical ventilation                                                                                                                                                             |
| Viral co-infection <sup>1</sup>      | Laboratory detection of any virus concurrent with SARS-CoV-2 infection                                                                                                                                                                                             |
| Bacterial co-infection <sup>1</sup>  | Laboratory detection of one or more bacteria concurrent with SARS-CoV-2 infection and treated with antibiotics by the attending physician                                                                                                                          |
| Mucocutaneous involvement            | Rash, conjunctivitis, strawberry tongue, red cracked lips or redness or swelling of extremities.                                                                                                                                                                   |
| Gastrointestinal involvement         | Vomiting, diarrhea or abdominal pain                                                                                                                                                                                                                               |
| Cardiac involvement                  | Echocardiographic evidence of pericarditis, valvulitis, coronary vessel abnormalities, or biochemical evidence with troponin >0.5 pg/ml or NT-proB-type Natriuretic Peptide (BNP) >100 pg/ml (11).                                                                 |
| Acute kidney injury                  | Serum creatinine above 140 umol/L for children up to 7 days of age, 55 umol/L for children 7 to 364 days of age, 100 umol/L for children 1 to 12 years of age and 140 umol/L for those 13 to 17 years of age (excluding children with chronic renal disease) (14). |
| Hepatitis                            | Alanine aminotransferase (ALT) >40 IU/L and/or aspartate aminotransferase (AST) > 50 IU/L (15).                                                                                                                                                                    |
| Neurological complications           | Worsening or new onset of seizure, encephalopathy, dystonia, chorea, athetosis, hemiparesis and/or abnormal cerebrospinal fluid cell count for age (>15 X 10 <sup>9</sup> /L if less than 30 days of age and >5 X 10 <sup>9</sup> /L if older)                     |
| Clinical hematological complications | Disseminated intravascular coagulation, thrombosis or bleeding.                                                                                                                                                                                                    |

<sup>1</sup> Investigations were at the discretion of the treating clinician.

Supplementary Table 2 – Characteristics of 232 cases of MIS-C, according to country of admission

|                                               | <b>Canada<br/>(N=190)</b> | <b>Costa Rica<br/>(N=30)</b> | <b>Iran<br/>(N=12)</b> |
|-----------------------------------------------|---------------------------|------------------------------|------------------------|
| Median age (IQR)                              | 6.23 (2.80-9.82)          | 6.08 (3.93-8.34)             | 3.43 (2.03-4.81)       |
| Sex - Male                                    | 108 (57%)                 | 17 (57%)                     | 5 (42%)                |
| Median days of fever prior to admission (IQR) | 5 (3-6)                   | 4 (3-6)                      | 3.5 (3-5)              |
| Median total duration of fever in days (IQR)  | 6 (5-8)                   | 5 (4-8)                      | 8.5 (7-10)             |
| Mucocutaneous signs                           | 159 (84%)                 | 29 (97%)                     | 8 (67%)                |
| Gastrointestinal involvement                  | 165 (87%)                 | 30 (100%)                    | 12 (100%)              |
| Median length of stay in days (IQR)           | 5 (4-8)                   | 7 (5-9)                      | 9.5 (8-11)             |

Appendix 2, as submitted by the authors. Appendix to: Merckx J, Cooke S, El Tal T, et al. Predictors of severe illness in children with multisystem inflammatory syndrome after SARS-CoV-2 infection: a multicentre cohort study. *CMAJ* 2022. doi: 10.1503/cmaj.210873.

Copyright © 2022 The Author(s) or their employer(s). To receive this resource in an accessible format, please contact us at [cmajgroup@cmaj.ca](mailto:cmajgroup@cmaj.ca).

|                                           |                        |                       |                      |
|-------------------------------------------|------------------------|-----------------------|----------------------|
| Highest level of care required            |                        |                       |                      |
| Ward admission:                           | 128 (67%)              | 26 (87%)              | 5 (42%)              |
| No supplemental oxygen                    | 118 (62%)              | 21 (70%)              | 4 (33%)              |
| Supplemental oxygen                       | 10 (5%)                | 5 (17%)               | 1 (8%)               |
| ICU admission:                            | 62 (33%)               | 4 (13%)               | 7 (58%)              |
| Observation +/- supplemental oxygen       | 17 (9%)                | 1 (3%)                | 4 (33%)              |
| Required vasopressors                     | 33 (17%)               | 0 (0%)                | 2 (17%)              |
| Required non-invasive ventilation         | 4 (2%)                 | 0 (0%)                | 0 (0%)               |
| Required mechanical ventilation           | 4 (2%)                 | 3 (10%)               | 1 (8%)               |
| Admitted for indications other than MIS-C | 4 (2%)                 | 0 (0%)                | 0 (0%)               |
| Cardiac involvement                       | 105 (55%)              | 26 (87%)              | 5 (42%)              |
| Treatment <sup>1</sup>                    |                        |                       |                      |
| IVIG                                      | 153 (81%)              | 29 (97%)              | 12 (100%)            |
| Corticosteroids                           | 104 (55%) <sup>2</sup> | 14 (47%) <sup>3</sup> | 8 (75%) <sup>4</sup> |
| Anakinra                                  | 10 (5%)                | 0 (0%)                | 0 (0%)               |
| None of the above                         | 23 (12%)               | 1 (3%)                | 0 (0%)               |

Legend: IQR – interquartile range; IVIG – intravenous immunoglobulin

<sup>1</sup> Many patients received a combination of these treatments.

<sup>2</sup> 66 children were given 1 to 3 days of pulse methylprednisolone (>10 mg/kg/day)

<sup>3</sup> No children were given pulse methylprednisolone (>10 mg/kg/day)

<sup>4</sup> One child was given pulse methylprednisolone (>10 mg/kg/day)

Supplementary Table 3: Risk factors for hospital length of stay in 232 children with MIS-C - adjusted model coefficients from multivariable linear regression

|                                                   | <b>Difference in length of stay* - days (95% CI)</b> |  |
|---------------------------------------------------|------------------------------------------------------|--|
| <b>Age</b>                                        |                                                      |  |
| Age 6-12 years                                    | 2.0 (-0.1 to 4.1)                                    |  |
| Age 13-18 years                                   | 3.0 (-0.3 to 6.4)                                    |  |
| <b>Sex</b>                                        |                                                      |  |
| Female                                            | 0.7 (-1.2 to 2.7)                                    |  |
| <b>Country</b>                                    |                                                      |  |
| Costa-Rica                                        | 0.1 (-2.8 to 3.0)                                    |  |
| Iran                                              | 7.7 (3.2 to 12.2)                                    |  |
| <b>Initial WBC count†</b>                         |                                                      |  |
| Initial WBC < 5000 X 10 <sup>9</sup> /L           | 0.6 (-2.7 to 3.9)                                    |  |
| WBC > 15,000 X 10 <sup>9</sup> /L                 | 0.3 (-2.2 to 2.8)                                    |  |
| Initial platelets < 150,000 X 10 <sup>9</sup> /L† | -0.04 (-2.4 to 2.3)                                  |  |
| Initial ferritin > 500 mcg/L†                     | 2.8 (0.5 to 5.1)                                     |  |
| Gastrointestinal involvement                      | 0.1 (-3.1 to 3.4)                                    |  |
| Mucocutaneous involvement                         | -0.9 (-3.7 to 1.9)                                   |  |
| Admission Nov 1, 2020-Mar 7, 2021                 | 1.2 (-0.8 to 3.2)                                    |  |

Models are adjusted for sex, age, country, presence of comorbidity, coinfection, treatment and admission time.

\*Values represent difference in length of stay in days by covariate, compared to the reference group.

†Number of observations differing from complete dataset of 232, WBC: 4 missing; platelets: 2 missing; ferritin: 7 missing

Supplementary Table 4 – Risk factors for intensive care unit admission stratified by confirmed (N=106) and probable (N=126) cases with MIS-C - adjusted model estimates

|                                       | Confirmed cases (N=106)*    |                                 |                        | Probable cases (N=126)*     |                                 |                        |
|---------------------------------------|-----------------------------|---------------------------------|------------------------|-----------------------------|---------------------------------|------------------------|
|                                       | Absolute risk (%)<br>95% CI | Risk difference (%)<br>(95% CI) | Relative risk<br>95%CI | Absolute risk (%)<br>95% CI | Risk difference (%)<br>(95% CI) | Relative risk<br>95%CI |
| <b>ICU admission</b>                  |                             |                                 |                        |                             |                                 |                        |
| Age 0-5 years                         | 33.8<br>(19.6-48.0)         | -                               | -                      | 7.5 (2.6-12.5)              | -                               | -                      |
| Age 6-12 years                        | 55.2<br>(42.3-68.2)         | 21.4 (1.4-41.5)                 | 1.63<br>(0.82-2.45)    | 34.6<br>(22.0-47.3)         | 27.1<br>(13.5-40.7)             | 4.60<br>(1.14-8.06)    |
| Age 13-18 years                       | 54.5<br>(29.5-79.5)         | 20.7 (-9.1-50.5)                | 1.61<br>(0.57-2.66)    | 39.7<br>(13.1-66.2)         | 32.1 (5.0-59.2)                 | 5.16<br>(0.29-10.24)   |
| Male                                  | 43.7<br>(32.5-55.0)         | -                               | -                      | 16.7<br>(8.3-25.2)          | -                               | -                      |
| Female                                | 49.6<br>(36.4-62.8)         | 5.9 (-11.7-23.4)                | 1.13<br>(0.71-1.56)    | 21.6<br>(12.6-30.5)         | 4.8 (-8.0-17.6)                 | 1.29<br>(0.41-2.16)    |
| Canada                                | 58.2<br>(46.2-70.3)         | -                               | -                      | 17.1<br>(11.3-22.9)         | -                               | -                      |
| Costa-Rica                            | 14.4<br>(0.9-27.8)          | -43.9; -62.8, -25.0             | 0.25<br>(0.01-0.49)    | NA                          | NA                              | NA                     |
| Iran                                  | 57.7<br>(21.2-94.2)         | -0.6 (-40.4-39.3)               | 0.99<br>(0.31-1.67)    | 75.3<br>(38.2-112.4)        | 58.2<br>(20.6-95.8)             | 4.40<br>(1.75-7.05)    |
| Initial WBC<5000 X 10 <sup>9</sup> /L | 34.5<br>(7.3-61.7)          | -10.5 (-40.0-19.0)              | 0.77<br>(0.13-1.40)    | 22.3 (5.8-38.9)             | 3.0 (-15.2-21.3)                | 1.15<br>(0.18-2.13)    |
| WBC 500-15,000 X 10 <sup>9</sup> /L   | 45.0<br>(35.0-55.0)         | -                               | -                      | 19.3<br>(11.2-27.4)         | -                               | -                      |
| WBC >15,000 X 10 <sup>9</sup> /L      | 55.4<br>(31.4-79.3)         | 10.4 (-15.6-36.3)               | 1.23<br>(0.63-1.83)    | 16.8<br>(3.9-29.8)          | -2.5 (-18.5-13.5)               | 0.87<br>(0.07-1.67)    |

|                                                 |                     |                    |                     |                     |                     |                     |
|-------------------------------------------------|---------------------|--------------------|---------------------|---------------------|---------------------|---------------------|
| Initial platelets <150,000 X 10 <sup>9</sup> /L | 46.1<br>(30.1-62.1) | -1.4 (-21.2-18.3)  | 0.97<br>(0.56-1.38) | 22.7<br>(10.0-35.5) | 4.8 (-10.0-19.6)    | 1.27<br>(0.39-2.15) |
| Initial platelets ≥150,000 X 10 <sup>9</sup> /L | 47.6<br>(37.1-58.1) | -                  | -                   | 17.9<br>(11.1-24.8) | -                   | -                   |
| Initial ferritin >500 mcg/L                     | 61.1<br>(47.5-74.6) | 21.2 (4.1-38.3)    | 1.53<br>(1.01-2.05) | 31.8<br>(16.2-47.5) | 16.8 (-0.3-34.0)    | 2.12<br>(0.72-3.52) |
| Gastrointestinal involvement                    | 45.1<br>(36.3-53.9) | -16.3 (-51.2-18.6) | 0.73<br>(0.31-1.16) | 18.2<br>(12.2-24.1) | -10.3 (-31.2-10.7)  | 0.64<br>(0.14-1.14) |
| Mucocutaneous involvement                       | 48.1<br>(38.8-57.4) | 11.1 (-13.2-35.5)  | 1.30<br>(0.48-2.13) | 18.8<br>(12.6-25.0) | -3.0 (-22.5-16.5)   | 0.86<br>(0.07-1.64) |
| Admission prior to Nov 1, 2020                  | 45.6<br>(27.4-63.9) | -                  | -                   | 14.5<br>(8.0-21.0)  | -                   | -                   |
| Admission Nov 1, 2020-Mar 7, 2021               | 46.4<br>(27.4-63.9) | 0.8 (-20.4-22.0)   | 1.02<br>(0.55-1.49) | 32.4<br>(18.6-46.3) | 17.9<br>(22.7-33.6) | 2.24<br>(0.81-3.66) |

Models are adjusted for sex, age, country, presence of comorbidity, coinfection, confirmed case status, treatment and admission time.

Average marginal effects are presented with adjusted RDs from multivariable logistic regressions.

NA: not applicable, empty cell for Costa-Rico probable cases

\*: Number of observations differing from complete dataset of 106 for confirmed cases:

WBC: 4 missing, platelets: 2 missing, ferritin: 3 missing; of 126 for probable cases: 1 missing for all models, ferritin: 5 missing.

Supplementary Table 5 – Risk of severe MIS-C (defined as intensive care unit admission) in 190 children in Canada by quarter of the year

|                                    | Absolute risk (%)<br>95% CI | Risk difference (%)<br>(95% CI) | Relative risk<br>95%CI |
|------------------------------------|-----------------------------|---------------------------------|------------------------|
| <b>ICU admission</b>               |                             |                                 |                        |
| Admission March-May 2020 (Q1)      | 17.8 (3.8-31.8)             | -                               | -                      |
| Admission June-August (Q2)         | 32.4 (16.4-48.3)            | 14.6 (-5.9-35.1)                | 1.82 (0.18-3.47)       |
| Admission September-November (Q3)  | 24.2 (13.1-35.2)            | 6.4 (-11.2-24.1)                | 1.36 (0.13-2.59)       |
| Admission Dec 2020-March 2021 (Q4) | 43.1 (31.8-54.3)            | 25.3 (6.5-44.0)                 | 2.42 (0.36-4.50)       |

Model is adjusted for sex, age, presence of comorbidity, coinfection, confirmed case status and treatment.

Average marginal effects are presented with adjusted RDs from multivariable logistic regression.

Supplementary Table 6 - Risk of critical disease (defined as intensive care unit admission with need for vasopressors or ventilation) in 232 children with MIS-C – adjusted model estimates

|                                                    | Absolute risk (%)<br>95% CI | Risk difference (%)<br>(95% CI) | Relative risk<br>95%CI |
|----------------------------------------------------|-----------------------------|---------------------------------|------------------------|
| Age 0-5 years                                      | 8.1 (3.2-12.9)              | -                               | -                      |
| Age 6-12 years                                     | 33.7 (24.6-42.8)            | 25.7 (15.0-36.3)                | 4.19 (1.33-7.05)       |
| Age 13-18 years                                    | 27.8 (11.4-44.2)            | 19.7 (2.3-37.1)                 | 3.45 (0.44-6.46)       |
| Male                                               | 18.9 (12.7-25.0)            | -                               | -                      |
| Female                                             | 22.0 (14.8-29.1)            | 3.1 (-6.5-12.7)                 | 1.16 (0.62-1.71)       |
| Canada                                             | 22.6 (17.1-28.2)            | -                               | -                      |
| Costa-Rica                                         | 7.1 (-0.1-14.6)             | -15.6 (-25.2-59.8)              | 0.31 (-0.04-0.66) #    |
| Iran                                               | 30.2 (55.2-55.0)            | 7.6 (-18.0-33.2)                | 1.34 (0.18-2.49)       |
| Initial WBC<5000 X<br>10 <sup>9</sup> /L           | 21.7 (8.0-35.4)             | 3.5 (-11.4-18.4)                | 1.19 (0.35-2.03)       |
| WBC 500-15,000 X<br>10 <sup>9</sup> /L             | 18.2 (12.8-23.6)            | -                               | -                      |
| WBC >15,000 X<br>10 <sup>9</sup> /L                | 27.0 (14.4-39.6)            | 8.8 (-5.2-22.7)                 | 1.48 (0.64-2.32)       |
| Initial platelets<br><150,000 X 10 <sup>9</sup> /L | 24.1 (14.5-33.6)            | 5.2 (-6.2-16.5)                 | 1.27 (0.63-1.92)       |
| Initial platelets<br>≥150,000 X 10 <sup>9</sup> /L | 18.9 (13.3-24.4)            | -                               | -                      |
| Initial ferritin >500<br>mcg/L                     | 39.6 (28.3-50.9)            | 25.7 (13.3-38.2)                | 2.86 (1.53-4.19)       |
| Gastrointestinal<br>involvement                    | 19.8 (15.0-24.5)            | -6.4 (-25.3-12.4)               | 0.75 (0.20-1.31)       |
| Mucocutaneous<br>involvement                       | 22.7 (17.6-27.9)            | 14.0 (4.6-23.3)                 | 2.59 (0.24-4.95)       |
| Admission prior to<br>Nov 1, 2020                  | 13.1 (6.4-19.7)             | -                               | -                      |
| Admission Nov 1,<br>2020-Mar 7, 2021               | 26.5 (18.5-34.5)            | 13.4 (2.1-24.7)                 | 2.03 (0.73-3.32)       |

Models are adjusted for sex, age, country, presence of comorbidity, coinfection, confirmed case status, treatment and admission time.

Average marginal effects are presented with adjusted RDs from multivariable logistic regressions.

\*: Number of observations differing from complete dataset of 232, WBC: 4 missing; platelets: 2 missing; ferritin: 7 missing

#: The margins package calculates the confidence interval using the delta method assuming a sampling distribution that is normal and therefore rarely provides a theoretical implausible lower bound smaller than zero.

Supplementary Table 7 – Risk factors for cardiac involvement in 232 children with MIS-C - adjusted model estimates

|                                                 | Absolute risk (%)<br>95% CI | Risk difference (%)<br>(95% CI) | Relative risk<br>95%CI |
|-------------------------------------------------|-----------------------------|---------------------------------|------------------------|
| <b>Cardiac involvement<sup>1</sup></b>          |                             |                                 |                        |
| Age 0-5 years                                   | 56.8 (48.9-64.7)            | -                               | -                      |
| Age 6-12 years                                  | 62.4 (52.9-71.9)            | 5.6 (-7.0-18.2)                 | 1.10 (0.87-1.33)       |
| Age 13-18 years                                 | 54.9 (37.1-72.8)            | -1.9 (-21.7-17.9)               | 0.97 (0.62-1.31)       |
| Male                                            | 61.5 (54.0-68.9)            | -                               | -                      |
| Female                                          | 55.1 (46.6-63.6)            | -6.4 (-17.8-5.0)                | 0.90 (0.72-1.07)       |
| Canada                                          | 57.4 (51.0-63.9)            | -                               | -                      |
| Costa-Rica                                      | 78.1 (60.3-95.9)            | 20.7 (12.0-40.1)                | 1.36 (1.00-1.72)       |
| Iran                                            | 38.2 (13.3-63.1)            | -19.2 (-45.1-6.7)               | 0.67 (0.22-1.11)       |
| Initial WBC<5000 X 10 <sup>9</sup> /L           | 55.8 (37.0-74.5)            | -3.8 (-23.8-16.3)               | 0.94 (0.60-1.27)       |
| WBC 500-15,000 X 10 <sup>9</sup> /L             | 60.0 (52.6-66.5)            | -                               | -                      |
| WBC >15,000 X 10 <sup>9</sup> /L                | 55.7 (42.7-68.7)            | -3.8 (-18.7-11.1)               | 0.94 (0.69-1.18)       |
| Initial platelets <150,000 X 10 <sup>9</sup> /L | 64.6 (53.1-76.0)            | 7.9 (-5.7-21.5)                 | 1.14 (0.89-1.39)       |
| Initial platelets ≥150,000 X 10 <sup>9</sup> /L | 56.7 (50.0-63.3)            | -                               | -                      |
| Initial ferritin >500 mcg/L                     | 64.6 (51.8-77.3)            | 6.3 (-8.2-20.9)                 | 1.11 (0.85-1.36)       |
| Gastrointestinal involvement                    | 57.2 (51.2-63.2)            | -11.9 (-28.8-5.1)               | 0.83 (0.62-1.03)       |
| Mucocutaneous involvement                       | 58.8 (52.6-64.9)            | 0.8 (-14.6-16.3)                | 1.01 (0.74-1.28)       |
| Admission prior to Nov 1, 2020                  | 44.1 (34.9-53.3)            | -                               | -                      |
| Admission Nov 1, 2020-Mar 7, 2021               | 75.0 (66.4-83.6)            | 30.9 (17.3-44.4)                | 1.70 (1.27-2.13)       |

<sup>1</sup> Defined as features of myocardial dysfunction, pericarditis, valvulitis, or coronary abnormalities (including echocardiographic findings or elevated Troponin/NT-proBNP) Models are adjusted for sex, age, country, presence of comorbidity, coinfection, confirmed case status and admission time.

Average marginal effects are presented with adjusted RDs from multivariable logistic regressions.



\*: Number of observations differing from complete dataset of 232, WBC: 4 missing; platelets: 2 missing; ferritin: 7 missing

Supplementary Table 8 – Risk factors for cardiac involvement stratified by confirmed (N=106) and probable (N=126) cases with MIS-C - adjusted model estimates

|                                        | Confirmed cases (N=106)*    |                                 |                        | Probable cases (N=126)*     |                                 |                        |
|----------------------------------------|-----------------------------|---------------------------------|------------------------|-----------------------------|---------------------------------|------------------------|
|                                        | Absolute risk (%)<br>95% CI | Risk difference (%)<br>(95% CI) | Relative risk<br>95%CI | Absolute risk (%)<br>95% CI | Risk difference (%)<br>(95% CI) | Relative risk<br>95%CI |
| <b>Cardiac involvement<sup>1</sup></b> |                             |                                 |                        |                             |                                 |                        |
| Age 0-5 years                          | 66.6<br>(53.4-79.7)         | -                               | -                      | 45.4<br>(34.8-56.0)         | -                               | -                      |
| Age 6-12 years                         | 85.5<br>(75.5-95.5)         | 18.9 (1.8-36.0)                 | 1.28<br>(0.98-1.59)    | 42.0<br>(27.8-56.2)         | -3.4 (-21.2-14.4)               | 0.93<br>(0.54-1.31)    |
| Age 13-18 years                        | 78.9<br>(58.3-99.6)         | 12.4 (-12.9-37.6)               | 1.19<br>(0.78-1.59)    | 32.5<br>(5.8-59.2)          | -12.9 (-41.8-15.9)              | 0.72<br>(0.10-1.33)    |
| Male                                   | 80.3<br>(71.2-89.4)         | -                               | -                      | 46.8<br>(35.8-57.8)         | -                               | -                      |
| Female                                 | 71.1<br>(58.9-83.2)         | -9.2 (-24.6-6.2)                | 0.89<br>(0.70-1.07)    | 38.9<br>(27.2-50.6)         | -7.9 (-24.3-8.4)                | 0.83<br>(0.51-1.15)    |
| Canada                                 | 73.8<br>(63.5-84.1)         | -                               | -                      | 43.6<br>(35.6-51.7)         | -                               | -                      |
| Costa-Rica                             | 86.8<br>(75.2-98.5)         | 13.0 (-3.0-29.0)                | 1.18<br>(0.94-1.41)    | NA                          | NA                              | NA                     |
| Iran                                   | 60.6<br>(24.7-96.5)         | -13.2 (-51.6-25.2)              | 0.82<br>(0.31-1.33)    | 30.6 (-8.0-69.3)            | -13.0 (-52.6-26.6)              | 0.70<br>(0.00-1.60)    |
| Initial WBC<5000 X 10 <sup>9</sup> /L  | 89.5<br>(74.8-104.3)        | 14.5 (-2.9-31.9)                | 1.19<br>(0.95-1.44)    | 31.1<br>(5.0-57.3)          | -15.5 (-43.8-12.8)              | 0.66<br>(0.09-1.25)    |
| WBC 500-15,000 X 10 <sup>9</sup> /L    | 75.0<br>(66.4-83.7)         | -                               | -                      | 46.7<br>(35.7-57.6)         | -                               | -                      |
| WBC >15,000 X 10 <sup>9</sup> /L       | 72.8<br>(53.5-92.1)         | -2.2 (-23.6-19.2)               | 0.97<br>(0.69-1.25)    | 39.6<br>(21.7-57.5)         | -7.1 (-28.4-14.2)               | 0.85<br>(0.41-1.29)    |

|                                                 |                     |                   |                     |                      |                     |                     |
|-------------------------------------------------|---------------------|-------------------|---------------------|----------------------|---------------------|---------------------|
| Initial platelets <150,000 X 10 <sup>9</sup> /L | 77.4<br>(63.3-91.6) | 6.9 (-16.6-17.9)  | 1.01<br>(0.78-1.23) | 53.4<br>(35.3-71.6)  | 13.2 (-7.7-34.1)    | 1.33<br>(0.77-1.89) |
| Initial platelets ≥150,000 X 10 <sup>9</sup> /L | 76.7<br>(67.8-85.6) | -                 | -                   | 40.2<br>(31.2-49.3)  | -                   | -                   |
| Initial ferritin >500 mcg/L                     | 81.8<br>(69.3-94.4) | 4.6 (-11.0-20.1)  | 1.06<br>(0.85-1.26) | 50.6<br>(27.9 -73.4) | 8.9 (-15.7-33.6)    | 1.21<br>(0.61-1.82) |
| Gastrointestinal involvement                    | 76.2<br>(68.6-83.8) | -3.4 (-34.6-27.7) | 0.96<br>(0.58-1.33) | 41.0<br>(32.3-49.7)  | -14.1 (-37.3-9.1)   | 0.74<br>(0.41-1.07) |
| Mucocutaneous involvement                       | 76.6<br>(68.3-84.9) | 1.0 (-21.2-23.3)  | 1.01<br>(0.72-1.31) | 43.8<br>(35.1-52.5)  | 3.7 (-18.4-25.7)    | 1.09<br>(0.50-1.68) |
| Admission prior to Nov 1, 2020                  | 67.9<br>(50.4-85.5) | -                 | -                   | 31.8<br>(22.5-41.2)  | -                   | -                   |
| Admission Nov 1, 2020-Mar 7, 2021               | 79.0<br>(70.7-87.3) | 11.1 (-8.6-30.8)  | 1.16<br>(0.83-1.49) | 74.7<br>(60.1-89.3)  | 42.8<br>(25.3-60.3) | 2.34<br>(1.51-3.18) |

<sup>1</sup> Defined as features of myocardial dysfunction, pericarditis, valvulitis, or coronary abnormalities (including echocardiographic findings or elevated Troponin/NT-proBNP) Models are adjusted for sex, age, country, presence of comorbidity, coinfection, confirmed case status and admission time.

Average marginal effects are presented with adjusted RDs from multivariable logistic regressions.

Methodological note: Differences between the groups (confirmed versus probable) are not estimated and their difference cannot be purely inferred by comparison of the stratum specific estimates to the null (cf Gelman A, Stern H. The difference between “significant” and “not significant” is not itself statistically significant. *Am Stat* 2006; 60:328–331.) It also needs to be recognized that uncertainty is high (cf. wide confidence intervals), due to small sample sizes of the stratified groups.

\*: Number of observations differing from complete dataset of 106 for confirmed cases: WBC: 4 missing, platelets: 2 missing, ferritin: 3 missing; of 126 for probable cases: 1 missing for all models, ferritin: 5 missing.
